# Supplementary material for: A thermostable and alkaline β-mannanase from Clostridium chauvoei isolated from the ruminant gut exhibits potential for bioethanol production
Source: Research Square preprint supplement (doi:10.21203/rs.3.rs-7933920/v1), 2025-11-11
Supplement: Supplementary file 1 [file b300ed6d1acfa71257d93806.docx]

Table S1: Biochemical Characteristics of bacterial isolates from the ruminant gut

| Isolate  codes | Raffinose | H2S Production | Indole | Starch Hydrolysis | Catalase | Citrate | Nitrate | Gelation | Glucose | Fructose | MR | VP | Maltose | Galactose | Lactose | Glucose Gas | Sucrose | Suspected organisms |
| --- | --- | --- | --- | --- | --- | --- | --- | --- | --- | --- | --- | --- | --- | --- | --- | --- | --- | --- |
| A1 | **+** | **+** | **-** | **+** | **+** | **+** | **+** | **+** | **+** | **+** | **+** | **-** | **+** | **+** | **-** | **-** | **-** | *Clostridium sphenoid* |
| A2 | **-** | **+** | **-** | **+** | **+** | **-** | **+** | **+** |  | **+** | **+** | **+** | **+** | **+** | **-** | **-** | **-** | *C. clostridofonne* |
| A3a | **-** | **+** | **-** | **+** | **-** | **-** | **+** | **+** | **+** | **+** | **+** | **+** | **+** | **+** | **+** | **-** | **+** | *C. perfringens* |
| A3b | **-** | **+** | **-** | **+** | **-** | **-** | **+** | **+** | **+** | **+** | **+** | **-** | **+** | **+** | **-** | **-** | **-** | **-** |
| B1 | **-** | **+** | **-** | **+** | **-** | **-** | **+** | **+** | **+** | **+** | **+** | **-** | **+** | **+** | **-** | **-** | **-** | **-** |
| B2 | **+** | **+** | **-** | **-** | **-** | **-** | **+** | **+** | **+** | **+** | **+** | **-** | **+** | **+** | **-** | **-** | **-** | *C. perfringens* |
| B3 | **+** | **+** | **-** | **+** | **+** | **-** | **+** | **+** | **+** | **+** | **+** | **-** | **+** | **+** | **-** | **-** | **-** | **-** |
| B4a | **+** | **+** | **+** | **+** | **-** | **+** | **+** | **+** | **+** | **+** | **+** | **-** | **+** | **+** | **+** | **-** | **+** | - |
| B4b | **-** | **+** | **+** | **+** | **-** | **-** | **+** | **+** | **+** | **+** | **+** | **-** | **+** | **+** | **+** | **-** | **+** | *C. perfringens* |
| C3a | **-** | **+** | **-** | **+** | **-** | **-** | **+** | **+** | **+** | **+** | **+** | **-** | **+** | **+** | **+** | **-** | **+** | *C. perfringens* |
| C3b | **+** | **-** | **-** | **-** | **+** | **-** | **+** | **+** | **+** | **+** | **+** | **-** | **+** | **+** | **+** | **-** | **+** | *C. felsineum* |
| D1 | **+** | **-** | **-** | **-** | **-** | **-** | **+** | **+** | **+** | **+** | **+** | **-** | **+** | **+** | **+** | **-** | **+** | *C. perfringens* |
| D2 | **-** | **+** | **-** | **+** | **-** | **+** | **+** | **+** | **+** | **+** | **+** | **-** | **+** | **+** | **+** | **-** | **+** | *C. perfringens* |
| D3a | **-** | **-** | **-** | **+** | **+** | **-** | **+** | **+** | **+** | **+** | **+** | **-** | **+** | **+** | **+** | **+** | **+** | *C. perfringens* |
| D3b | **-** | **-** | **-** | **-** | **-** | **-** | **+** | **+** | **+** | **+** | **+** | **-** | **+** | **+** | **+** | **-** | **+** | *C. cnauvoei* |
| E1 | **-** | **-** | **-** | **-** | **-** | **-** | **+** | **+** | **+** | **+** | **+** | **+** | **+** | **+** | **+** | **-** | **+** | *C. cnauvoei* |
| E2 | **+** | **-** | **-** | **-** | **+** | **-** | **+** | **+** | **+** | **+** | **+** | **+** | **+** | **+** | **+** | **+** | **+** | *C. perfringens* |
| E3 | **-** | **-** | **-** | **+** | **-** | **+** | **+** | **+** | **+** | **+** | **+** | **-** | **+** | **+** | **+** | **-** | **+** | *C. perfringens* |
| F1 | **+** | **-** | **-** | **-** | **-** | **+** | **+** | **+** | **+** | **+** | **+** | **-** | **+** | **+** | **-** | **-** | **-** | *C. novyi* type A |
| F2 | **-** | **-** | **-** | **+** | **+** | **-** | **+** | **+** | **+** | **+** | **+** | **+** | **+** | **+** | **+** | **+** | **+** | *C. perfringens* |

**Table S2**: Fourier transform infra-red (FTIR) showing biobutanol production through the presence of bonds

| Range (cm-1) | Group and Class | Assignment |
| --- | --- | --- |
| 3337 | ̶ OH in alcohols and phenols | ̶ OH stretch |
| 2117 | N-C triple bond in isonitriles | N-C triple bond isonitriles |
| 1988 | substituted benzene ring | Several bands from overtones and C6H6 ring |
| 1636 | C=O | C=O stretch |
| 1097 | C ̶ O ̶ H in 2o or 3o alcohol | C-O-H stretch |
| 667 | C ̶ OH in alcohols | C ̶ OH bending |


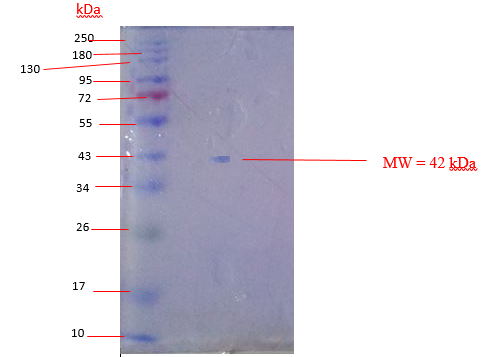


**Figure S2:** Electrophoregram of purified β-mannanase from *Clostridium cnauvoei*

**Figure S3a**: Effect of temperature on the activity of purified β-mannanase from *C. cnauvoei*

**Figure S3b**: Effect of pH on the activity of purified β-mannanase from *C. cnauvoei*

.

Figure S4: Kinetic parameters of the purified β-mannanase from *C. cnauvoei*

Figure S5a: Thermal inactivation of purified β-mannanase from *C. chauvoei*

Figure S5b: Arrhenius plot for heat inactivation of purified β-mannanase from *C. chauvoei*

**Figure S5c**: Temperature dependence of the decimal reduction (D-value) for purified β-mannanase


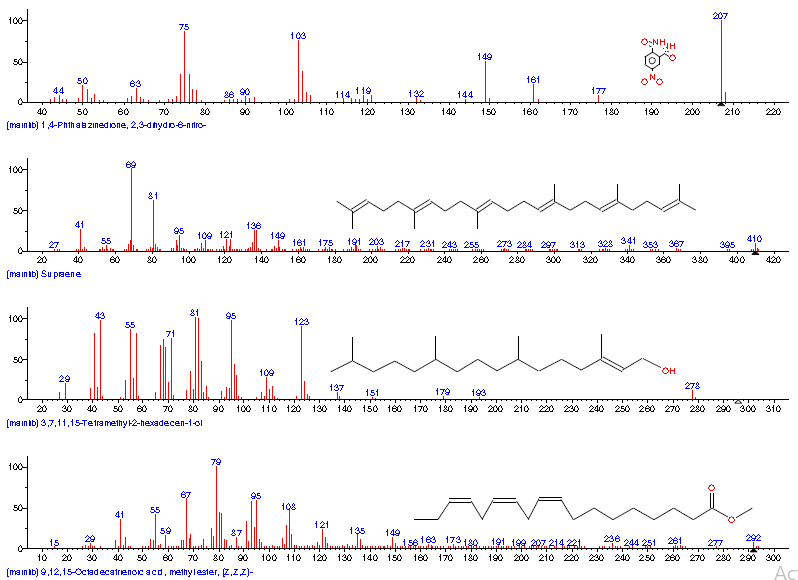


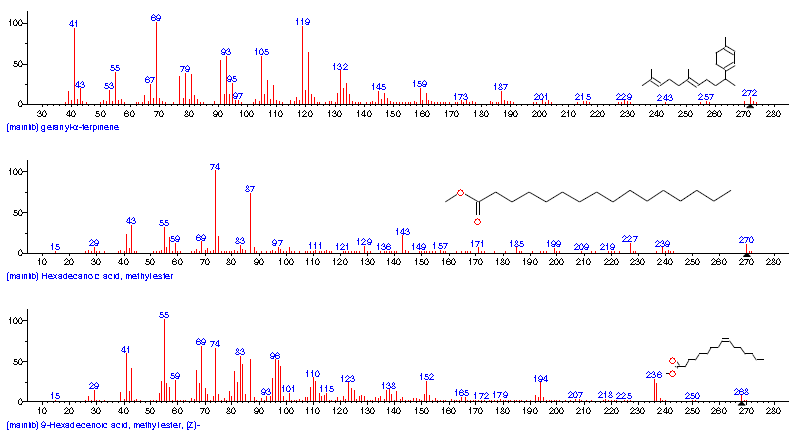


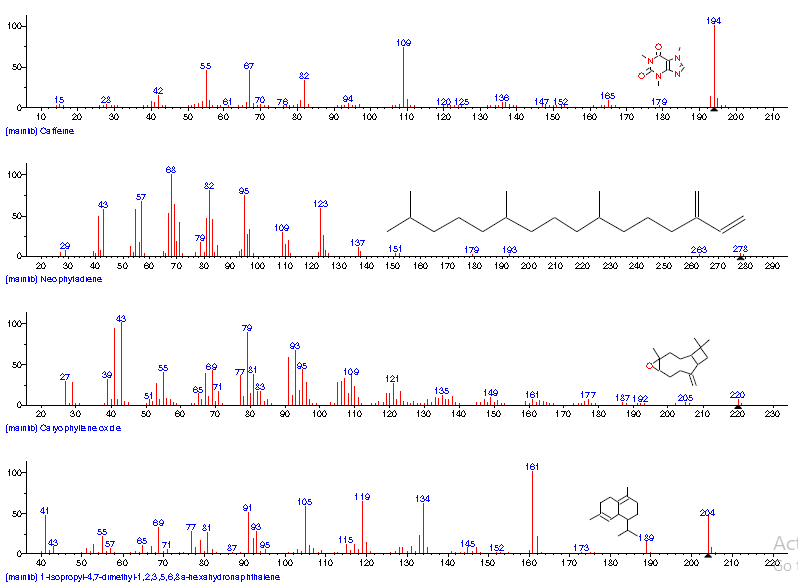


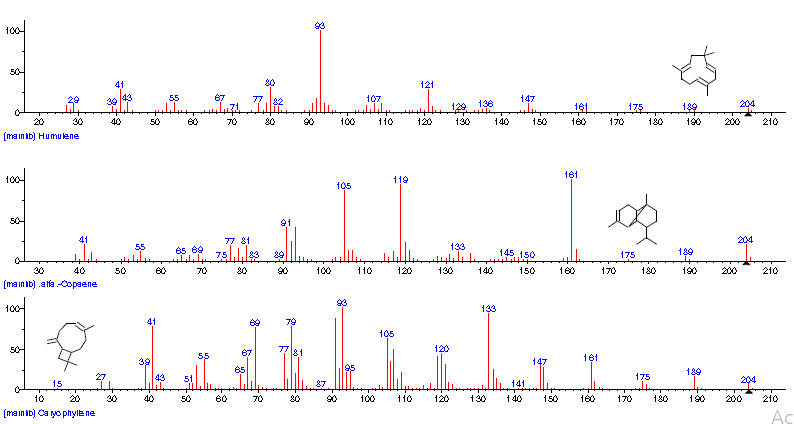


**Figure S6**: Gas chromatography analysis of fermented palm kernel cake reveals several volatile compounds, among which compounds 3, 7, 11, and 15-tetramethyl-2-hexadecen-1-ol corresponded to the expected biofuel product
